# Supplementary material for: TFEB controls sensitivity to chemotherapy and immuno-killing in non-small cell lung cancer
Source: PubMed Central journal article supplement (PMC11304671; doi:10.1186/s13046-024-03142-4), 2024-08-07
Supplement: 13046_2024_3142_MOESM1_ESM.pdf [file 13046_2024_3142_MOESM1_ESM.pdf]

## SUPPLEMENTAL DATA

**Supplemental Table S1. Demographic features of TCGA-LUAD cohort patients**

| TCGA-LUAD Dataset (n = 585)         | Male | Female |
|-------------------------------------|------|--------|
| Patients with Primary Tumor (n=531) | 246  | 287    |
| Patients with Normal Tissue (n=59)  | 25   | 34     |

**Supplemental Table S2. Clinical follow-up and gene expression data in the retrospective cohort of patients analyzed at the Department of Oncology, University of Torino, Italy**

| <b>Patient code</b>  | <b>1<sup>st</sup> line treatment</b> | <b>PFS (months)</b> | <b>OS (months)</b> | <b>TFEB (relative expression)</b> | <b>ABCC1 (relative expression)</b> | <b>ABCA1 (relative expression)</b> |
|----------------------|--------------------------------------|---------------------|--------------------|-----------------------------------|------------------------------------|------------------------------------|
| <b>16-C-00249</b>    | ICI-based immunotherapy              | 18                  | 21                 | 2.13                              | 0.52                               | 2.29                               |
| <b>17-C-007826</b>   | ICI-based immunotherapy              | 24                  | 26                 | 2.56                              | 0.41                               | 3.29                               |
| <b>17-C-04337</b>    | ICI-based immunotherapy              | 8                   | 5                  | 0.15                              | 2.96                               | 0.21                               |
| <b>17-C-04697</b>    | ICI-based immunotherapy              | 12                  | 21                 | 2.58                              | 0.61                               | 1.98                               |
| <b>17-C-04914 B</b>  | ICI-based immunotherapy              | 23                  | 26                 | 3.51                              | 0.42                               | 3.15                               |
| <b>17-C-05257 A</b>  | ICI-based immunotherapy              | 23                  | 30                 | 3.69                              | 0.28                               | 4.05                               |
| <b>17-I-00793A2</b>  | ICI-based immunotherapy              | 21                  | 28                 | 3.01                              | 1.04                               | 3.24                               |
| <b>17-I-10155</b>    | ICI-based immunotherapy              | 20                  | 24                 | 2.14                              | 0.62                               | 2.56                               |
| <b>17-I-10421</b>    | ICI-based immunotherapy              | 37                  | 46                 | 4.01                              | 0.14                               | 4.5                                |
| <b>17-I-12097 B1</b> | ICI-based immunotherapy              | 35                  | 54                 | 6.12                              | 0.29                               | 4.11                               |
| <b>17-I-12406</b>    | ICI-based immunotherapy              | 21                  | 26                 | 2.95                              | 0.61                               | 3.59                               |
| <b>17-I-12748</b>    | ICI-based immunotherapy              | 23                  | 23                 | 2.54                              | 0.42                               | 2.93                               |
| <b>17-I-13622A2</b>  | ICI-based immunotherapy              | 20                  | 26                 | 3.02                              | 0.69                               | 3.17                               |
| <b>17-I-13953 A</b>  | ICI-based immunotherapy              | 18                  | 28                 | 2.04                              | 0.46                               | 2.51                               |
| <b>17-I-14050</b>    | ICI-based immunotherapy              | 27                  | 38                 | 3.24                              | 0.84                               | 3.54                               |

|                      |                            |    |    |      |      |      |
|----------------------|----------------------------|----|----|------|------|------|
| <b>18-C-00265</b>    | ICI-based<br>immunotherapy | 9  | 19 | 1.47 | 0.54 | 1.97 |
| <b>18-C-01105 B</b>  | ICI-based<br>immunotherapy | 22 | 29 | 2.08 | 0.59 | 2.11 |
| <b>18-C-04462</b>    | ICI-based<br>immunotherapy | 41 | 53 | 3.96 | 0.04 | 4.96 |
| <b>18-C-04699</b>    | ICI-based<br>immunotherapy | 8  | 15 | 0.42 | 1.56 | 0.51 |
| <b>18-C-05582 B</b>  | ICI-based<br>immunotherapy | 58 | 71 | 4.92 | 0.14 | 5.36 |
| <b>18-I-00097 B</b>  | ICI-based<br>immunotherapy | 24 | 31 | 2.11 | 0.39 | 2.58 |
| <b>18-I-01832</b>    | ICI-based<br>immunotherapy | 22 | 27 | 2.56 | 0.42 | 2.14 |
| <b>18-I-02470A2</b>  | ICI-based<br>immunotherapy | 51 | 59 | 4.85 | 0.18 | 5.46 |
| <b>18-I-05255</b>    | ICI-based<br>immunotherapy | 29 | 50 | 3.28 | 0.28 | 4.02 |
| <b>18-I-05700A2</b>  | ICI-based<br>immunotherapy | 6  | 20 | 1.14 | 0.14 | 1.47 |
| <b>18-I-06387 B2</b> | ICI-based<br>immunotherapy | 3  | 9  | 0.15 | 2.15 | 0.26 |
| <b>18-I-07856</b>    | ICI-based<br>immunotherapy | 14 | 22 | 0.81 | 0.97 | 1.36 |
| <b>18-I-10670</b>    | ICI-based<br>immunotherapy | 23 | 28 | 0.96 | 1.13 | 1.82 |
| <b>18-I-11188</b>    | ICI-based<br>immunotherapy | 24 | 45 | 1.25 | 0.42 | 1.98 |
| <b>19-C-01646</b>    | ICI-based<br>immunotherapy | 35 | 49 | 2.28 | 0.21 | 2.45 |
| <b>19-C-5330</b>     | ICI-based<br>immunotherapy | 15 | 55 | 3.15 | 0.17 | 3.85 |
| <b>19-I-01684</b>    | ICI-based<br>immunotherapy | 21 | 30 | 2.84 | 0.52 | 3.24 |
| <b>19-I-08588</b>    | ICI-based<br>immunotherapy | 4  | 5  | 0.08 | 2.36 | 0.12 |

|                      |                            |    |    |      |      |      |
|----------------------|----------------------------|----|----|------|------|------|
| <b>19-I-5272</b>     | ICI-based<br>immunotherapy | 1  | 2  | 0.45 | 3.18 | 0.39 |
| <b>20-C-02138</b>    | ICI-based<br>immunotherapy | 11 | 23 | 1.91 | 1.15 | 2.15 |
| <b>20-C-2023</b>     | ICI-based<br>immunotherapy | 32 | 46 | 3.15 | 0.18 | 3.58 |
| <b>20-I-00099</b>    | ICI-based<br>immunotherapy | 2  | 5  | 0.08 | 2.89 | 0.14 |
| <b>20-I-00644 B1</b> | ICI-based<br>immunotherapy | 29 | 63 | 4.16 | 0.09 | 4.28 |
| <b>20-I-04286</b>    | ICI-based<br>immunotherapy | 9  | 19 | 1.28 | 1.47 | 1.58 |
| <b>20-I-2504</b>     | ICI-based<br>immunotherapy | 9  | 11 | 1.11 | 1.63 | 1.23 |
| <b>20-I-4408</b>     | ICI-based<br>immunotherapy | 43 | 53 | 4.52 | 0.05 | 4.65 |
| <b>ITACA 135</b>     | Pt-based<br>chemotherapy   | 5  | 11 | 0.81 | 1.51 | 1.12 |
| <b>ITACA 15</b>      | Pt-based<br>chemotherapy   | 45 | 63 | 5.11 | 0.17 | 5.64 |
| <b>ITACA 157</b>     | Pt-based<br>chemotherapy   | 4  | 14 | 0.76 | 1.28 | 0.85 |
| <b>ITACA 205</b>     | Pt-based<br>chemotherapy   | 1  | 7  | 0.38 | 2.41 | 0.25 |
| <b>ITACA 206</b>     | Pt-based<br>chemotherapy   | 4  | 11 | 0.94 | 1.48 | 0.62 |
| <b>ITACA 24</b>      | Pt-based<br>chemotherapy   | 6  | 15 | 0.56 | 1.52 | 0.78 |
| <b>ITACA 242</b>     | Pt-based<br>chemotherapy   | 15 | 16 | 0.81 | 1.34 | 0.72 |
| <b>ITACA 244</b>     | Pt-based<br>chemotherapy   | 2  | 19 | 1.17 | 0.91 | 1.58 |
| <b>ITACA 292</b>     | Pt-based<br>chemotherapy   | 3  | 5  | 0.29 | 2.25 | 0.09 |
| <b>ITACA 348</b>     | Pt-based<br>chemotherapy   | 14 | 19 | 2.15 | 0.81 | 1.85 |

|                  |                          |    |     |      |      |      |
|------------------|--------------------------|----|-----|------|------|------|
| <b>ITACA 383</b> | Pt-based<br>chemotherapy | 1  | 2   | 0.17 | 3.26 | 0.23 |
| <b>ITACA 426</b> | Pt-based<br>chemotherapy | 1  | 3   | 0.26 | 3.82 | 0.07 |
| <b>ITACA 446</b> | Pt-based<br>chemotherapy | 1  | 6   | 0.11 | 2.81 | 0.19 |
| <b>ITACA 544</b> | Pt-based<br>chemotherapy | 2  | 3   | 0.18 | 3.45 | 0.08 |
| <b>ITACA 587</b> | Pt-based<br>chemotherapy | 29 | 45  | 3.69 | 0.15 | 4.28 |
| <b>ITACA 607</b> | Pt-based<br>chemotherapy | 1  | 2   | 0.48 | 4.11 | 0.19 |
| <b>ITACA 623</b> | Pt-based<br>chemotherapy | 12 | 30  | 2.54 | 1.25 | 3.15 |
| <b>ITACA 624</b> | Pt-based<br>chemotherapy | 1  | 3   | 0.23 | 0.46 | 0.42 |
| <b>ITACA 631</b> | Pt-based<br>chemotherapy | 2  | 5   | 0.28 | 0.28 | 0.53 |
| <b>ITACA 641</b> | Pt-based<br>chemotherapy | 29 | 41  | 3.46 | 0.21 | 3.78 |
| <b>ITACA 670</b> | Pt-based<br>chemotherapy | 8  | 23  | 2.07 | 1.14 | 2.14 |
| <b>ITACA 671</b> | Pt-based<br>chemotherapy | 2  | 6   | 0.31 | 2.58 | 0.32 |
| <b>ITACA 690</b> | Pt-based<br>chemotherapy | 3  | 6   | 0.46 | 2.46 | 0.25 |
| <b>ITACA 715</b> | Pt-based<br>chemotherapy | 47 | 130 | 5.28 | 0.09 | 6.12 |
| <b>ITACA 745</b> | Pt-based<br>chemotherapy | 3  | 11  | 0.72 | 1.34 | 0.81 |
| <b>ITACA 757</b> | Pt-based<br>chemotherapy | 30 | 33  | 2.16 | 1.22 | 2.98 |
| <b>ITACA 759</b> | Pt-based<br>chemotherapy | 27 | 40  | 3.59 | 0.32 | 4.15 |
| <b>ITACA 87</b>  | Pt-based<br>chemotherapy | 1  | 6   | 0.14 | 2.15 | 0.22 |

|                 |                            |    |    |      |      |      |
|-----------------|----------------------------|----|----|------|------|------|
| <b>ITACA166</b> | Pt-based<br>chemotherapy   | 22 | 32 | 2.19 | 0.76 | 2.76 |
| <b>ITACA301</b> | Pt-based<br>chemotherapy   | 15 | 28 | 2.04 | 0.92 | 2.15 |
| <b>ITACA636</b> | Pt-based<br>chemotherapy   | 14 | 16 | 1.92 | 0.72 | 1.15 |
| <b>MOLEC. 1</b> | ICI-based<br>immunotherapy | 2  | 4  | 0.41 | 3.15 | 0.36 |
| <b>MOLEC. 2</b> | ICI-based<br>immunotherapy | 9  | 17 | 1.12 | 1.08 | 1.24 |
| <b>SI ITACA</b> | Pt-based<br>chemotherapy   | 21 | 33 | 2.73 | 0.78 | 2.84 |

Pt: cisplatin or carboplatin; ICI: immune checkpoint inhibitors; PFS: progression free survival; OS: overall survival. *TFE3*, *ABCA1* and *ABCC1* levels were expressed as relative expression toward the housekeeping gene *B2M*.

**Supplemental Table S3. Primer sequences used in qRT-PCR and ChIP**

| <b>Primers</b>                       | <b>Forward</b>                 | <b>Reverse</b>                        |
|--------------------------------------|--------------------------------|---------------------------------------|
| TFEB                                 | 5'-GACTCAGAAGCGAGAGCTAACA      | 5'-TGTGATTGTCTTTCTTCTGCCG             |
| ABCA1                                | 5'-CAGAGCTCACAGCAGGGAC         | 5'-CTTCTCCGGAAGGCTTGTC                |
| ABCC1                                | 5' -TCTGGTCAGCCCAACTCTCT       | 5'-CCTGTGATCCACCAGAAGGT               |
| ATP7B                                | 5'-TCTCTGGTCATCCTGGTGGTT-3'    | 5'-GGGCTTCTGAGGTTTTGCTCT-3'           |
| B2M                                  | 5'<br>AGCAAGGACTGGTCTTTCTATCTC | 5'-<br>ATOTCTCCATCCCACTTAAGTATCT<br>T |
| <b>TFEB sites on the promoter of</b> |                                |                                       |
| ABCA1                                | GGACCCTAAGACACCTGCTG           | TTCCCGGCCTCTGTTTATGT                  |
| ABCC1                                | ACCTCAGTTTCCCATCTGT            | AAGAAACCCAGGTGCAGAGA                  |

**Supplemental Table S4. Cholesterol homeostasis-related genes analyzed by PCR Array  
in wild-type and TFEB-silenced cells**

NCI-H2228 cells:

| Target  | WT Normalized<br>Expression | shTFEB Normalized<br>Expression | shTFEB<br>fold<br>change | Compared to Regulation<br>Threshold |
|---------|-----------------------------|---------------------------------|--------------------------|-------------------------------------|
| ABCA1   | 0.00632                     | 0.00552                         | -1.14395                 | No change                           |
| ABCG1   | 0.0382                      | 0.01617                         | -2.36338                 | Down-regulated*                     |
| ACAA2   | 0.04657                     | 0.01143                         | -4.07516                 | Down-regulated**                    |
| ACTB    | 5.19942                     | 2.66482                         | -1.95114                 | Down-regulated*                     |
| ANKRA2  | 0.05191                     | 0.0452                          | -1.14843                 | No change                           |
| APOD    | 0.01544                     | 0.01036                         | -1.48958                 | No change                           |
| APOE    | 0.00049                     | 0.00008                         | -5.81657                 | Down-regulated**                    |
| APOL1   | 0.02616                     | 0.01122                         | -2.33151                 | Down-regulated*                     |
| APOL2   | 0.028                       | 0.00999                         | -2.80211                 | Down-regulated*                     |
| CNBP    | 0.27238                     | 0.26009                         | -1.04726                 | No change                           |
| CXCL16  | 0.05064                     | 0.03065                         | -1.65227                 | Down-regulated*                     |
| CYB5R3  | 0.06758                     | 0.01504                         | -4.49319                 | Down-regulated*                     |
| CYP39A1 | 0.00102                     | 0.00124                         | 1.21801                  | No change                           |
| CYP51A1 | 0.03726                     | 0.06578                         | 1.76542                  | Up-regulated*                       |
| DHCR24  | 0.0476                      | 0.01658                         | -2.87171                 | Down-regulated*                     |
| DHCR7   | 0.0146                      | 0.0033                          | -4.42772                 | Down-regulated**                    |
| FDFT1   | 0.0315                      | 0.00065                         | -48.40565                | Down-regulated***                   |
| FDPS    | 0.38113                     | 0.20606                         | -1.84955                 | Down-regulated*                     |
| GUSB    | 0.22555                     | 0.11849                         | -1.90363                 | Down-regulated*                     |
| HDLBP   | 0.45042                     | 0.28273                         | -1.59308                 | Down-regulated*                     |
| HMGCR   | 0.00263                     | 0.00177                         | -1.48091                 | No change                           |
| HMGCS1  | 0.00454                     | 0.01664                         | 3.66876                  | Up-regulated**                      |
| IDI1    | 0.04883                     | 0.0637                          | 1.30451                  | No change                           |
| INSIG1  | 0.09391                     | 0.0647                          | -1.45142                 | No change                           |
| INSIG2  | 0.02382                     | 0.04048                         | 1.69928                  | Up-regulated*                       |
| LCAT    | 0.00172                     | 0.00024                         | -7.26568                 | Down-regulated**                    |
| LDLR    | 0.03474                     | 0.03437                         | -1.0107                  | No change                           |
| LDLRAP  | 0.01569                     | 0.0065                          | -2.41377                 | Down-regulated*                     |
| 1       |                             |                                 |                          |                                     |



|         |         |         |           |                   |
|---------|---------|---------|-----------|-------------------|
| LIPE    | 0.00531 | 0.0026  | -2.04656  | Down-regulated*   |
| LRP10   | 0.02839 | 0.01523 | -1.86392  | Down-regulated*   |
| LRP12   | 0.01871 | 0.01645 | -1.13739  | No change         |
| LRP6    | 0.01205 | 0.01351 | 1.12065   | No change         |
| LRPAP1  | 0.0705  | 0.04844 | -1.45529  | No change         |
| MBTPS1  | 0.11263 | 0.04245 | -2.65347  | Down-regulated*   |
| MVD     | 0.00397 | 0.00098 | -4.03232  | Down-regulated**  |
| NR1H4   | 0.00464 | 0.00129 | -3.59611  | Down-regulated**  |
| NSDHL   | 0.06324 | 0.04451 | -1.42061  | No change         |
| OSBPL1A | 0.00946 | 0.01184 | 1.25146   | No change         |
| OSBPL5  | 0.00508 | 0.00028 | -17.95912 | Down-regulated*** |
| PCSK9   | 0.002   | 0.00113 | -1.76333  | Down-regulated*   |
| PMVK    | 0.05994 | 0.03129 | -1.91548  | Down-regulated*   |
| PPARD   | 0.01303 | 0.00343 | -3.7973   | Down-regulated**  |
| PRKAA2  | 0.00265 | 0.00639 | 2.40644   | Up-regulated**    |
| PRKAG2  | 0.06931 | 0.05961 | -1.16277  | No change         |
| RPLP0   | 2.69508 | 2.21951 | -1.21427  | No change         |
| SCAP    | 0.02359 | 0.00826 | -2.85598  | Down-regulated**  |
| SCARF1  | 0.00003 | 0.0003  | 10.36432  | Up-regulated***   |
| SNX17   | 0.22834 | 0.07601 | -3.00394  | Down-regulated**  |
| SOAT1   | 0.02597 | 0.00666 | -3.90041  | Down-regulated**  |
| SORL1   | 0.01369 | 0.00885 | -1.54709  | No change         |
| SREBF1  | 0.02128 | 0.01043 | -2.04095  | Down-regulated*   |
| SREBF2  | 0.01569 | 0.00878 | -1.78666  | Down-regulated*   |
| STARD3  | 0.02747 | 0.01865 | -1.47259  | No change         |
| TM7SF2  | 0.29261 | 0.22981 | -1.27327  | No change         |
| TRERF1  | 0.00745 | 0.00321 | -2.32198  | Down-regulated*   |
| VLDLR   | 0.01075 | 0.0071  | -1.51412  | No change         |

#### NCI-H441 cells

| Target | WT Normalized Expression | shTFEB Normalized Expression | shTFEB fold change | Compared to Regulation Threshold |
|--------|--------------------------|------------------------------|--------------------|----------------------------------|
| ABCA1  | 0.01331                  | 0.0287                       | 2.15663            | Up-regulated*                    |
| ABCG1  | 0.04606                  | 0.00103                      | -44.60911          | Down-regulated***                |
| ACAA2  | 0.00234                  | 0.00387                      | 1.65344            | No change                        |

|             |         |         |           |                   |
|-------------|---------|---------|-----------|-------------------|
| ACTB        | 2.4819  | 1.88008 | -1.3201   | No change         |
| AKR1D1      | 0.0028  | 0.00203 | -1.3773   | No change         |
| ANKRA2      | 0.15805 | 0.13815 | -1.14404  | No change         |
| APOA2       | 0.00593 | 0.00009 | -65.0202  | Down-regulated*** |
| APOA4       | 0.00015 | 0.0003  | 2.02819   | Up-regulated*     |
| APOD        | 0.00084 | 0.00071 | -1.18445  | No change         |
| APOE        | 0.00027 | 0.00011 | -2.43598  | Down-regulated**  |
| APOF        | 0.00133 | 0.00002 | -81.02505 | Down regulated*** |
| APOL1       | 0.03516 | 0.01608 | -2.18581  | Down-regulated**  |
| APOL2       | 0.01202 | 0.00813 | -1.47862  | No change         |
| CDH13       | 0.00431 | 0.00096 | -4.48992  | Down-regulated**  |
| CELA3B      | 0.00005 | 0.00002 | -2.2615   | Down-regulated**  |
| CNBP        | 2.09116 | 2.49292 | 1.19212   | No change         |
| CXCL16      | 0.02099 | 0.03593 | 1.71165   | Up-regulated*     |
| CYB5R3      | 0.037   | 0.02927 | -1.26422  | No change         |
| CYP11A1     | 0.00121 | 0.00037 | -3.27162  | Down-regulated**  |
| CYP39A1     | 0.00335 | 0.00381 | 1.13462   | No change         |
| CYP51A1     | 0.19914 | 0.27185 | 1.36516   | No change         |
| CYP7B1      | 0.00626 | 0.00777 | 1.24155   | No change         |
| DHCR24      | 0.16111 | 0.17103 | 1.0616    | No change         |
| DHCR7       | 0.17051 | 0.13457 | -1.26706  | No change         |
| FDFT1       | 0.07277 | 0.20263 | 2.78455   | Up-regulated**    |
| FDPS        | 0.83331 | 0.53098 | -1.56938  | No change         |
| GUSB        | 0.21435 | 0.15087 | -1.42079  | No change         |
| HDLBP       | 0.85871 | 0.63182 | -1.35911  | No change         |
| HMGCR       | 0.04428 | 0.066   | 1.49064   | No change         |
| HMGCS1      | 0.02989 | 0.18492 | 6.18569   | Up-regulated**    |
| IDII        | 0.38176 | 0.30556 | -1.24936  | No change         |
| INSIG1      | 0.5445  | 0.46502 | -1.17092  | No change         |
| INSIG2      | 0.49204 | 0.29921 | -1.64447  | No change         |
| LCAT        | 0.03399 | 0.00167 | -20.40966 | Down-regulated*** |
| LDLR        | 0.16837 | 0.22662 | 1.34596   | No change         |
| LDLRAP<br>1 | 0.02131 | 0.00986 | -2.16103  | Down-regulated**  |
| LIPE        | 0.00122 | 0.00104 | -1.1796   | No change         |
| LRP10       | 0.04788 | 0.02033 | -2.35542  | Down-regulated**  |

|         |         |         |           |                   |
|---------|---------|---------|-----------|-------------------|
| LRP12   | 0.11268 | 0.18731 | 1.66228   | Up-regulated*     |
| LRP6    | 0.08824 | 0.13293 | 1.50646   | No change         |
| LRPAP1  | 0.12919 | 0.14528 | 1.12456   | No change         |
| MBTPS1  | 0.25246 | 0.48357 | 1.91545   | Up-regulated*     |
| MVD     | 0.0066  | 0.00492 | -1.34042  | No change         |
| MVK     | 0.28939 | 0.07591 | -3.81244  | Down-regulated*** |
| NSDHL   | 0.16373 | 0.15855 | -1.03262  | No change         |
| OLR1    | 0.0077  | 0.00091 | -8.44545  | Down-regulated*** |
| OSBPL1A | 0.04573 | 0.05616 | 1.228     | No change         |
| OSBPL5  | 0.01562 | 0.00077 | -20.31702 | Down-regulated*** |
| PCR     | 0.99884 | 0.75653 | -1.3203   | No change         |
| PCSK9   | 0.01624 | 0.00053 | -30.69018 | Down-regulated*** |
| PMVK    | 0.07279 | 0.05979 | -1.21732  | No change         |
| PPARD   | 0.11381 | 0.12951 | 1.13787   | No change         |
| PRKAG2  | 0.2307  | 0.13982 | -1.64997  | Down-regulated*   |
| RPLP0   | 16.7169 | 0.45742 | -36.54624 | Down-regulated*** |
| SCAP    | 0.01359 | 0.00696 | -1.95202  | Down-regulated*   |
| SCARF1  | 0.00268 | 0.00085 | -3.13359  | Down-regulated**  |
| SNX17   | 0.14996 | 0.20833 | 1.38928   | No change         |
| SOAT1   | 0.07254 | 0.16556 | 2.28219   | Up-regulated*     |
| SORL1   | 0.13875 | 0.20359 | 1.46739   | No change         |
| SREBF1  | 0.02541 | 0.03085 | 1.21439   | No change         |
| SREBF2  | 0.027   | 0.02399 | -1.12553  | No change         |
| STAB1   | 0.01193 | 0.00053 | -22.64322 | Down-regulated*** |
| STARD3  | 0.03829 | 0.01876 | -2.04119  | Down-regulated*   |
| TM7SF2  | 0.57316 | 0.43579 | -1.31522  | No change         |
| TRERF1  | 0.00132 | 0.00105 | -1.25936  | No change         |
| VLDLR   | 0.00851 | 0.01108 | 1.30163   | No change         |

Fold-Change ( $2^{(-\Delta\Delta Ct)}$ ) is the normalized gene expression ( $2^{(-\Delta Ct)}$ ) in TFEB-silenced (shTFEB) cells, divided the normalized gene expression ( $2^{(-\Delta Ct)}$ ) in wild-type (WT) cells, where Ct is the threshold cycle in qRT-PCR. Fold-change values greater than 1 indicate up-regulation, fold-change values less than 1 indicate down-regulation. The p values are calculated based on a Student's t-test of the replicate  $2^{(-\Delta Ct)}$  values for each gene. \*p<0.05, \*\*p<0.01, \*\*\*p<0.001: shTFEB vs WT cells.

**Supplemental Table S5. Hematochemical parameters of animals after euthanasia.**

|                                       | WT               |                  |                  |                  | shTFEB           |                  |                  |                   |
|---------------------------------------|------------------|------------------|------------------|------------------|------------------|------------------|------------------|-------------------|
|                                       | vehicle          | PT               | NZ               | NZ+PT            | vehicle          | PT               | NZ               | NZ+PT             |
| <b>RBC</b><br>(x 10 <sup>6</sup> /μl) | 13.23 +<br>2.01  | 12.18 +<br>1.95  | 13.21 +<br>1.42  | 12.18 +<br>1.69  | 12.59 +<br>2.47  | 11.29 +<br>2.61  | 13.48 +<br>4.52  | 12.11 + 3.51      |
| <b>Hb (g/dl)</b>                      | 13.11 +<br>1.44  | 12.45 +<br>2.31  | 13.48 +<br>0.91  | 12.41 +<br>1.13  | 12.63 +<br>1.94  | 12.01 +<br>2.15  | 12.54 +<br>1.59  | 12.04 + 2.51      |
| <b>WBC</b><br>(x 10 <sup>3</sup> /μl) | 13.28 +<br>3.02  | 14.37 +<br>2.39  | 12.04 +<br>2.15  | 13.08 +<br>1.57  | 11.07 +<br>2.07  | 13.29 +<br>2.51  | 12.11 +<br>1.27  | 13.45 + 2.45      |
| <b>PLT (x 10<sup>3</sup>/μl)</b>      | 873 + 134        | 745 + 234        | 916 + 115        | 8566 + 152       | 896 + 205        | 792 + 184        | 809 + 152        | 701 + 172         |
| <b>LDH (U/l)</b>                      | 9823 + 548       | 10523 +<br>627   | 8912 + 604       | 7598 + 501       | 7984 + 412       | 8216 + 285       | 7452 + 205       | 7205 + 236        |
| <b>AST (U/l)</b>                      | 156 + 44         | 135+ 34          | 143 + 39         | 144 + 49         | 134+ 29          | 146 + 34         | 152 + 47         | 162 + 44          |
| <b>ALT (U/l)</b>                      | 36 + 14          | 45 + 11          | 45 + 19          | 54 + 23          | 44 + 18          | 37 + 11          | 49 + 15          | 53 + 11           |
| <b>AP (U/l)</b>                       | 114 + 22         | 127 + 28         | 129 + 342        | 113 + 205        | 128 + 33         | 108 + 27         | 119 + 37         | 109 + 48          |
| <b>Creatinine</b><br>(mg/l)           | 0.071 +<br>0.009 | 0.082 +<br>0.007 | 0.069 +<br>0.011 | 0.079 +<br>0.009 | 0.074 +<br>0.007 | 0.079 +<br>0.010 | 0.072 +<br>0.008 | 0.0692 +<br>0.011 |
| <b>CPK (U/l)</b>                      | 231 + 22         | 256 + 42         | 282+ 48          | 304 + 55         | 205 + 38         | 249 + 52         | 281 + 61         | 298 + 84          |

Hematochemical parameters measured immediately after mice euthanasia. RBC: red blood cells; WBC: white blood cells; Hb: hemoglobin (Hb); PLT: platelets; LDH: lactate dehydrogenase; AST: aspartate aminotransferase; ALT: alanine aminotransferase; AP: alkaline phosphatase; CPK: creatine phosphokinase (CPK). Data are means ± SD (n= 5 mice/group treatment).

# Supplemental Figures

## Supplemental Figure S1

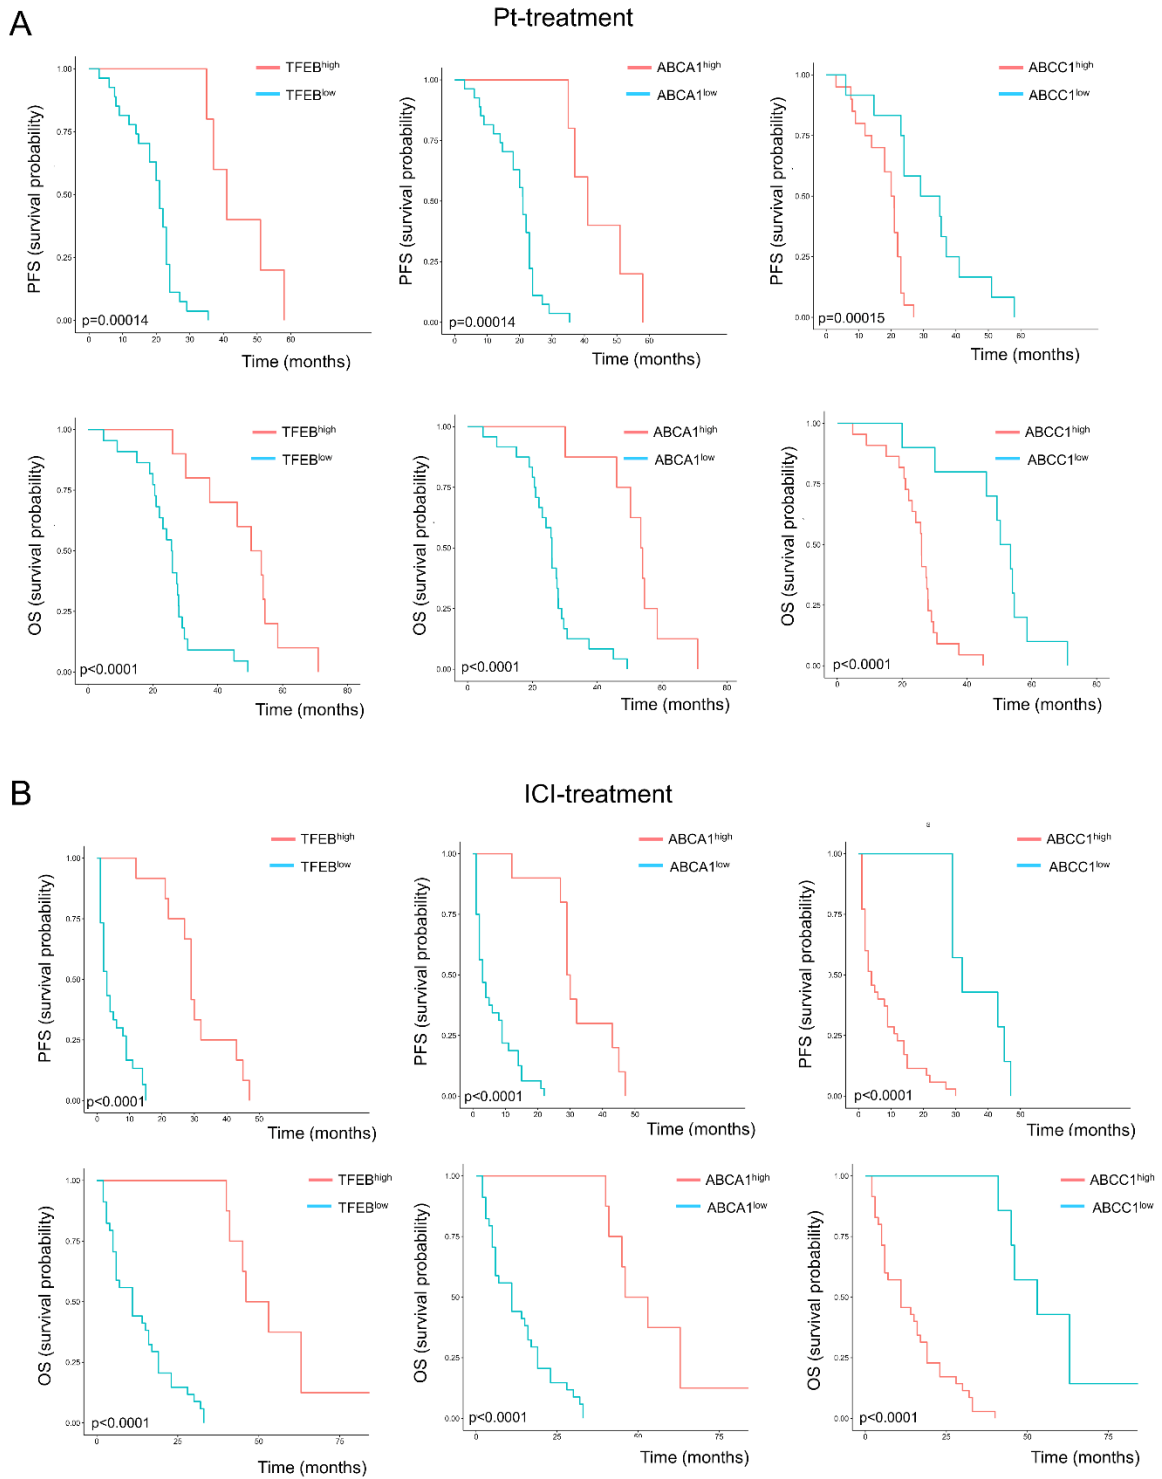

**Supplemental Figure 1. Impact of the expression of TFEB, ABCA1 and ABCC1 on survival of NSCLC patients.** Kaplan Meyer analysis of progression-free survival (PFS) and overall survival (OS) in patients treated with cisplatin/carboplatin (Pt; n=32; panel A) or pembrolizumab as immune checkpoint inhibitor (ICI; n=43; panel B) at the Department of Oncology, University of Torino, Italy. Patients were categorized in “high” and low” according to the median levels of TFEB, ABCA1 and ABCC1.

## Supplemental Figure S2

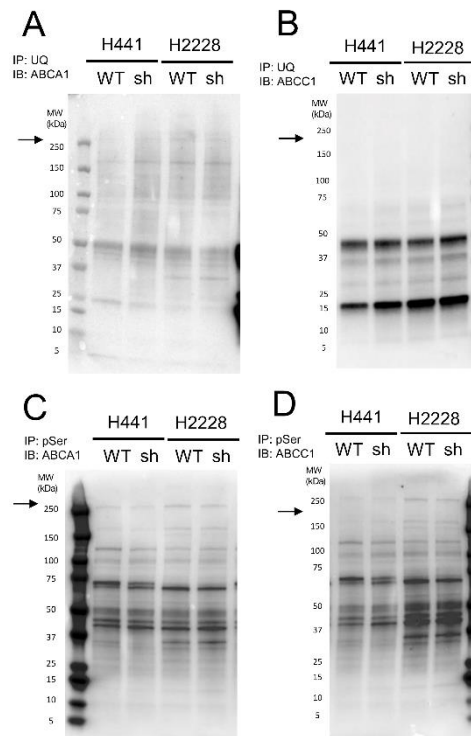

**Supplemental Figure S2. TFEB does not affect ubiquitination or phosphorylation of ABC transporters.** Ubiquitination (A-B) and phosphorylation (C-D) of ABCA1 (A, C) and ABCC1 (B, D) in wild-type (WT) and TFEB silenced (sh) NCI-H441 and NCI-H2228 cells. Lysates were immunoprecipitated (IP) with an anti-poly-ubiquitination (UQ) or an anti-phosphoserine (pSer) antibody, then immunoblotted (IB) for ABCA1 or ABCC1 (n=3 independent experiments).

Supplemental Figure S3

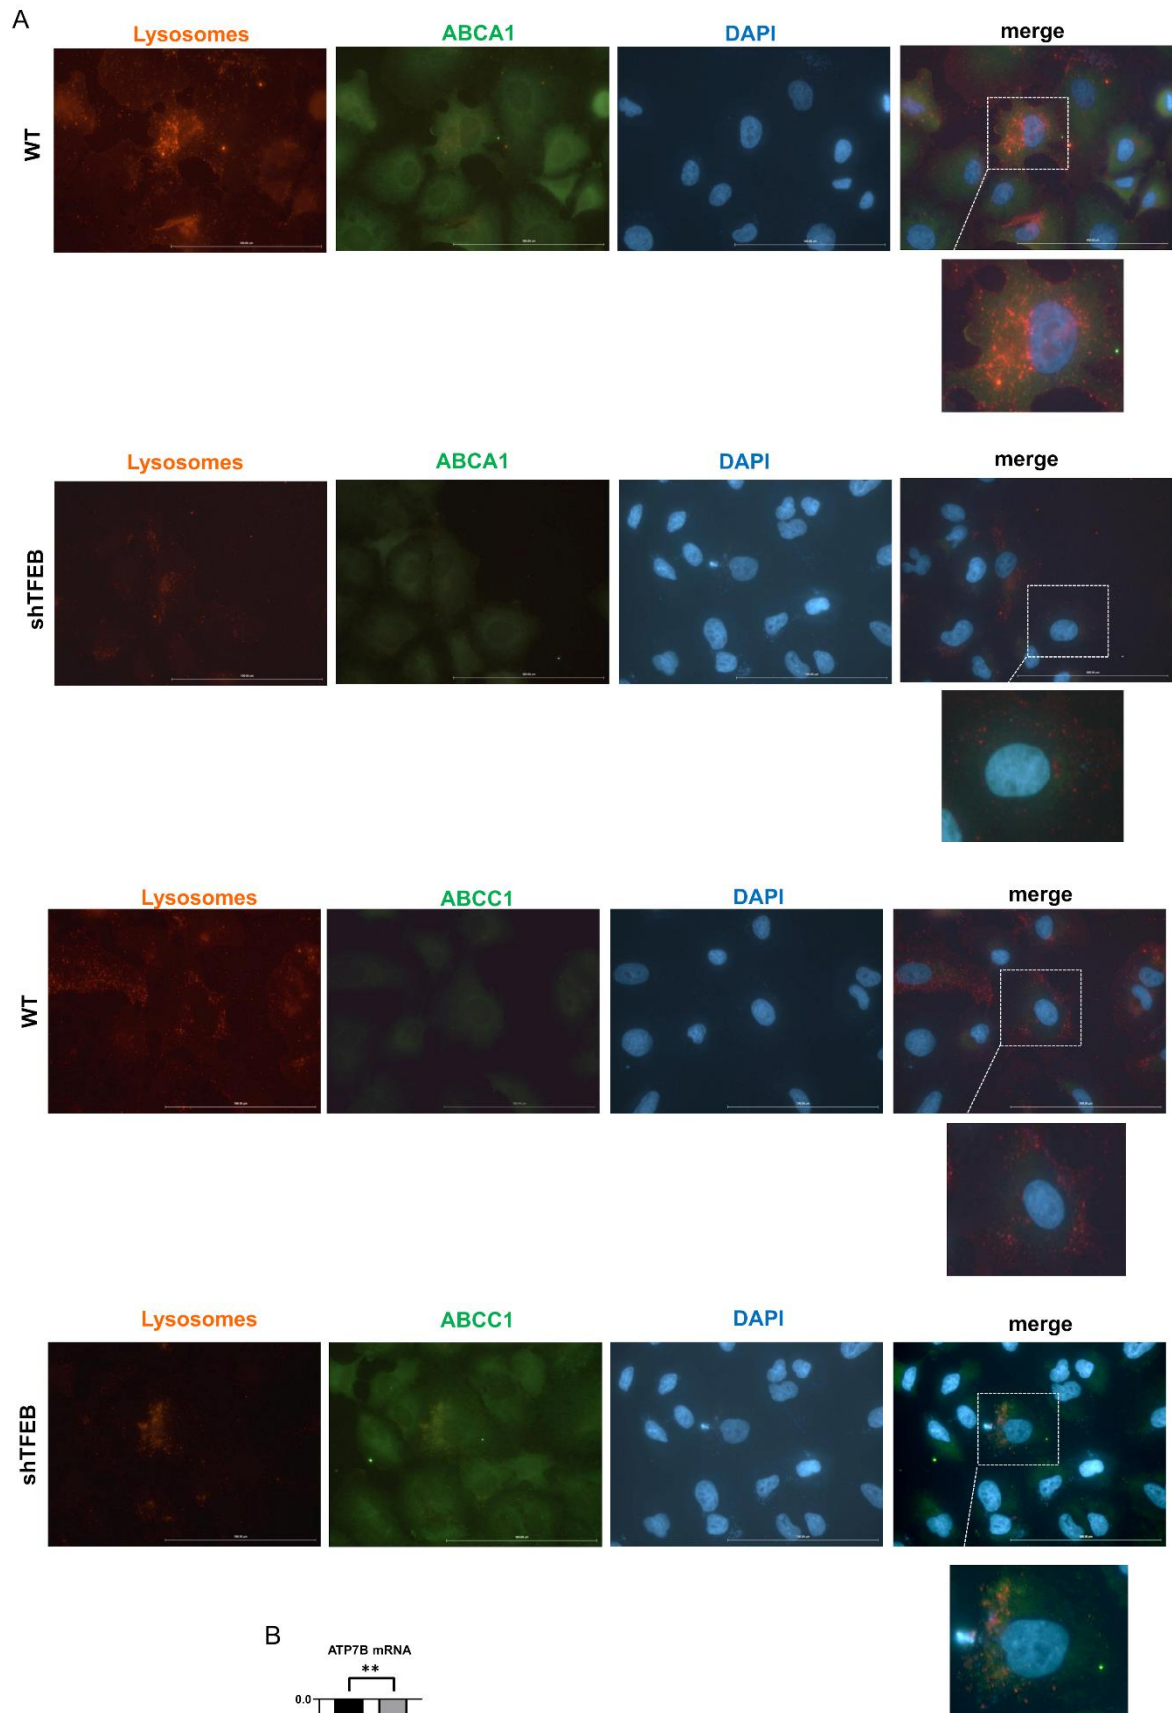



**Supplemental Figure S3. Analysis of lysosomes, ABCA1, ABCC1 and ATP7B in non-small cell lung cancer cells**

(A). Wild-type (WT) and TFEB-silenced (shTFEB) NCI-H2228 cells were stained with the BioTracker™ 560 Orange Lysosome Dye to label lysosomes plus an anti-ABCA1 or anti-ABCC1 antibody, followed by the DyLight™ 488- or Alexa Fluor488-conjugated secondary antibody. Nuclei were counterstained with DAPI. For each experimental point, a minimum of five microscopic fields were examined. Objective: 63× (1.4 numerical aperture); ocular: 10×. Bar=100 μm. (B). ATP7B mRNA in WT NCI-H441 and NCI-H2228 cells, transduced with the pLKO empty vector, and in cells silenced for TFEB (shTFEB), measured by qRT-PCR in triplicates. Data are means±SD of the mRNA fold change (n=3 independent experiments). \*\*p<0.01: shTFEB versus WT cells.

### Supplemental Figure S4

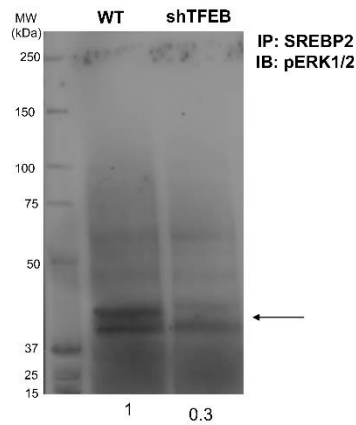

### Supplemental Figure S4. Co-immunoprecipitation between SREBP2 and phospho(Thr202/Tyr204)-ERK1/2 in non-small cell lung cancer cells

Lysates from wild-type (WT) and TFEB-silenced (shTFEB) NCI-H2228 cells were immunoprecipitated (IP) for SREBP2, using an antibody recognizing both precursor and cleaved/active SREBP2, then immunoblotted (IB) for phospho(Thr202/Tyr204)-ERK1/2 (n=3 independent experiments). The density of phospho(Thr202/Tyr204)-ERK1/2 in shTFEB cells is indicated below the image, setting the band density of WT cells as 1.

## Supplemental Figure S5

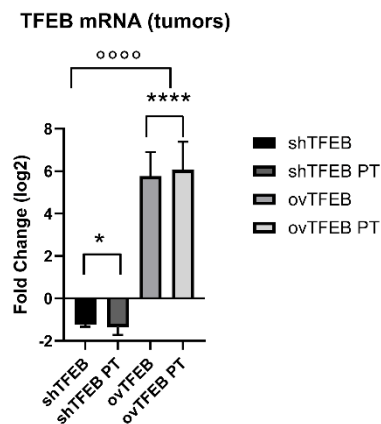

### Supplemental Figure S5. Intratumor levels of TFEB after silencing or overexpression.

$1 \times 10^6$  NCI-H2228 wild-type (WT), TFEB-silenced (shTFEB) cells or shTFEB cells overexpressing TFEB<sup>S142A</sup> (ovTFEB), mixed with 100  $\mu$ L Matrigel (Merck), were injected subcutaneously in female NOD SCID- $\gamma$  (NSG) mice engrafted with human hematopoietic CD34<sup>+</sup> cells (Hu-CD34<sup>+</sup>). When tumors reached the volume of 50 mm<sup>3</sup>, animals (n=5/group) were randomized and treated for 3 weeks as it follows: 1) control (CTRL) group, treated with 0.1 ml saline solution intravenously (i.v.), once a week; 2) cisplatin (PT) group, treated with 2 mg/kg cisplatin i.v., once a week. Animals were euthanized on day 28 after randomization with zolazepam (0.2 mL/kg) and xylazine (16mg/kg). RNA was extracted from fresh tumors and analyzed for TFEB expression by qRT-PCR, in triplicates (n=5 animals/group of treatment). Data are means $\pm$ SD. \*p<0.05, \*\*\*p<0.001: shTFEB/ovTFEB versus WT tumors; <sup>oooo</sup>p<0.001: ovTFEB vs shTFEB tumors.

# Supplemental Figure S6

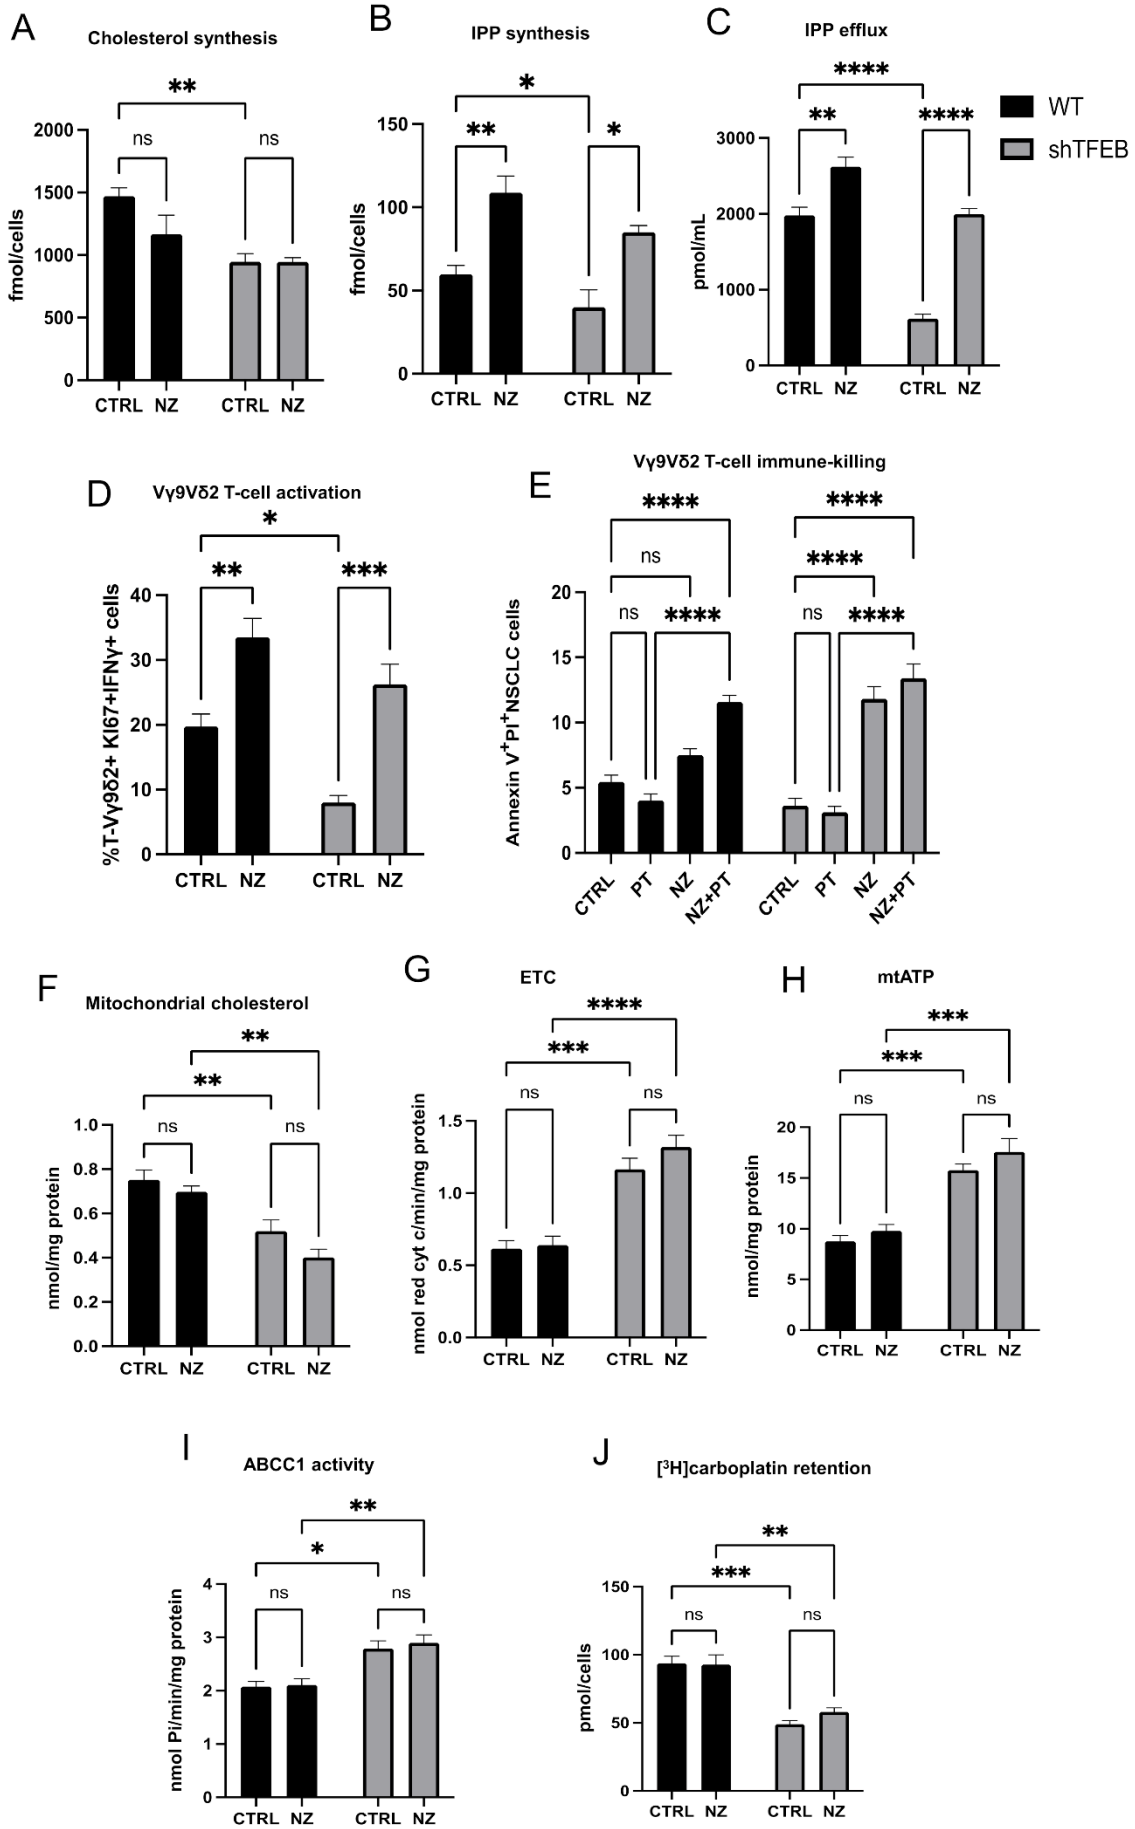

**Supplemental Figure S6. Chemo-immuno-sensitizing effects of self-assembled zoledronic acid nanoparticles on TFEB-silenced non-small cell lung cells.** Wild-type (WT) or TFEB-silenced (shTFEB) NCI-H2228 cells were incubated 24 h in fresh medium (CTRL) or with 100 nM self-assembled zoledronic acid nanoparticles (NZ). When indicated, 100  $\mu$ M cisplatin (corresponding to the IC<sub>25</sub> in WT cells; PT) was added, alone or with NZ. (A-C) Cholesterol synthesis, IPP synthesis and IPP efflux, measured by metabolic radiolabelling in duplicates. Data are means $\pm$ SD (n=3 independent experiments). \*p<0.05, \*\*p<0.01, \*\*\*\*p<0.0001: shTFEB cells versus WT cells. (D-E). Expansion and activation of V $\gamma$ 9V $\delta$ 2 T-lymphocytes, V $\gamma$ 9V $\delta$ 2 T-lymphocyte-mediated NSCLC cell immune-killing, measured by flow cytometry in duplicates. Data are means $\pm$ SD (n=3 independent experiments). \*p<0.05; \*\*p<0.01; \*\*\*p<0.001, \*\*\*\*p<0.0001: shTFEB versus WT cells. (F-H) Mitochondrial cholesterol and electron transport chain, measured spectrophotometrically in duplicates, mitochondrial (mt) ATP, measured by a chemiluminescence-based assay in duplicates. Data are means $\pm$ SD (n=3 independent experiments). \*\*p<0.01, \*\*\*p<0.001, \*\*\*\*p<0.0001: shTFEB versus WT cells. (I-J). ABCC1 catalytic activity, measured spectrophotometrically, and intracellular retention of [<sup>14</sup>C]-Carboplatin, measured by cell radiolabelling, in duplicates. Data are means $\pm$ SD (n=3 independent experiments). \*p<0.05, \*\*p<0.01, \*\*\*p<0.001: shTFEB versus WT cells.

## Supplemental Figure S7

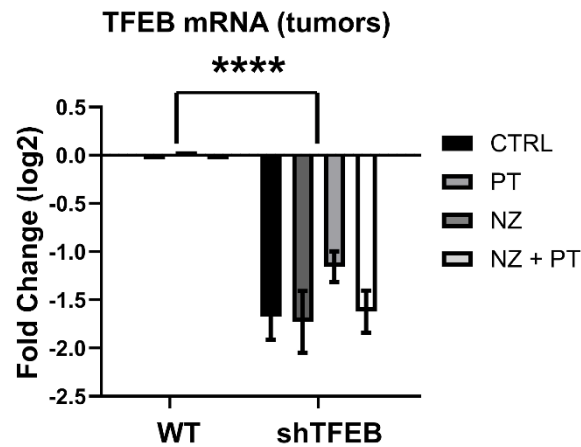

**Supplemental Figure S7. TFEB levels in explanted tumors.**  $1 \times 10^6$  NCI-H2228 wild-type (WT) and TFEB-silenced (shTFEB) cells were injected subcutaneously in Hu-CD34<sup>+</sup> mice. When tumors reached the volume of 50 mm<sup>3</sup>, animals (n=5/group) were randomized and treated for 3 weeks as it follows: 1) control (CTRL) group, treated with 0.1 ml saline solution intravenously (i.v.), once a week; 2) cisplatin (PT) group, treated with 2 mg/kg cisplatin i.v., once a week; 3) NZ, treated with 1 mg/kg NZ i.v., once a week; 4) NZ+PT group, receiving both drugs i.v., once a week simultaneously. Animals were euthanized on day 28 after randomization with zolazepam (0.2 mL/kg) and xylazine (16mg/kg). RNA was extracted from fresh tumors and analyzed for TFEB expression by RT-PCR, in triplicates (n=5 animals/group of treatment). Data are means $\pm$ SD. \*\*\*\*p<0.0001: shTFEB versus WT tumors.

Supplementary Figure S8

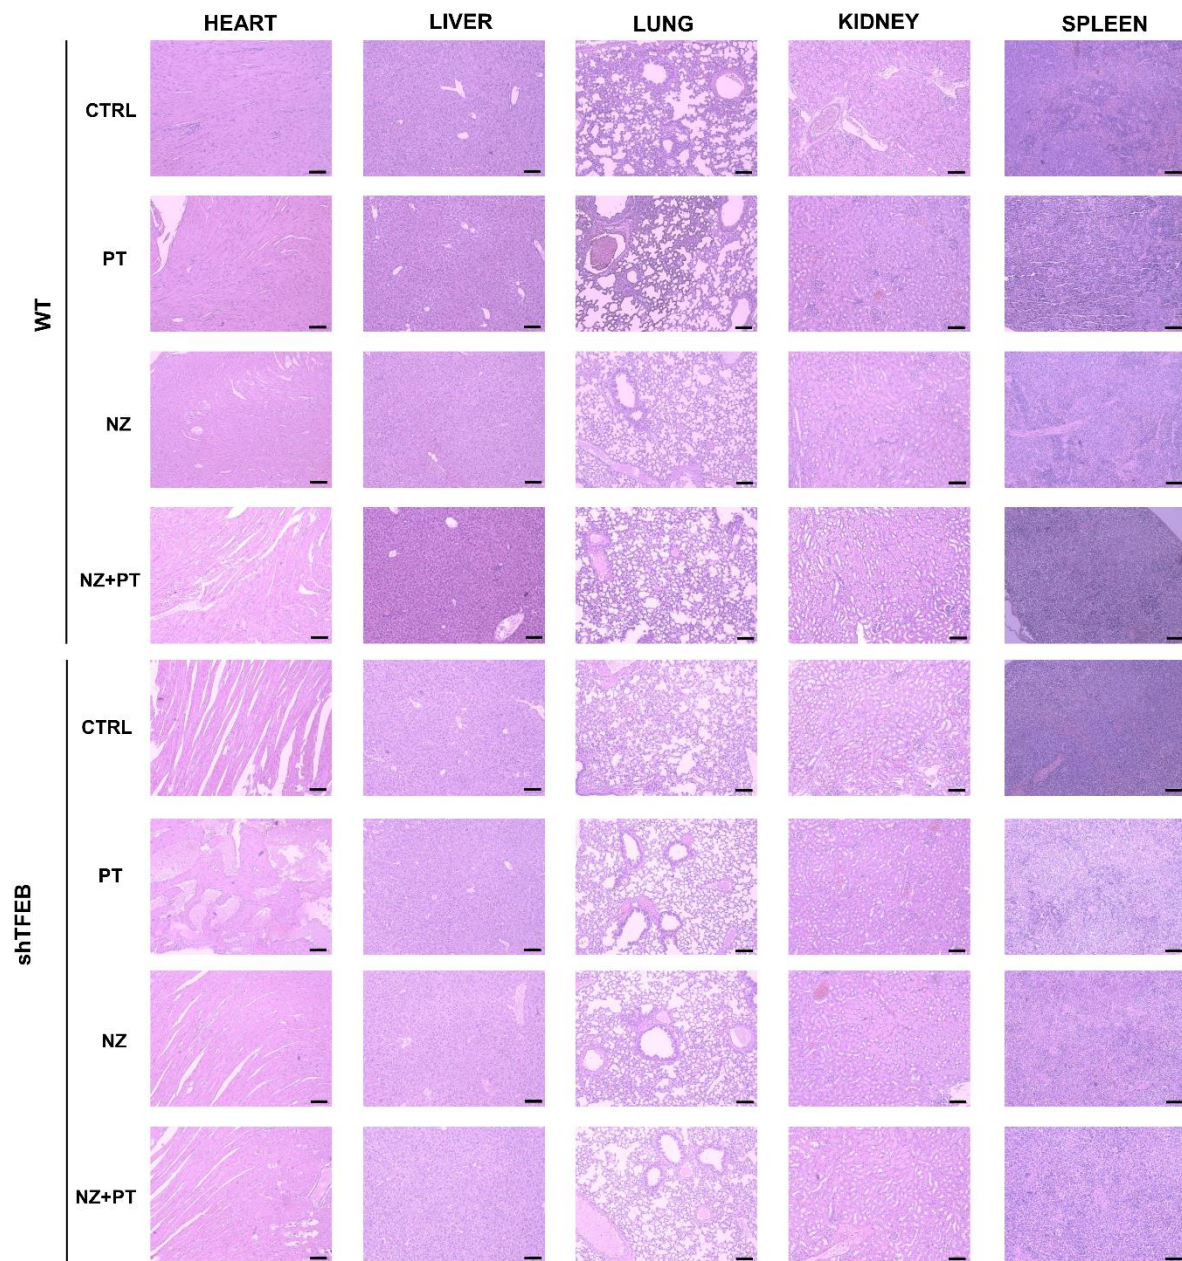

**Supplemental Figure S8. Hematoxylin-eosin staining of heart, liver, lung, kidneys, and spleen collected *post-mortem*.** The organs were collected from animals of each treatment group immediately after euthanasia, fixed and stained with hematoxylin-eosin. A minimum of 5 field/organ was analyzed in each animal. Objective: 10X; ocular: 10X; Bar =100  $\mu$ m.

Supplemental Figure S9

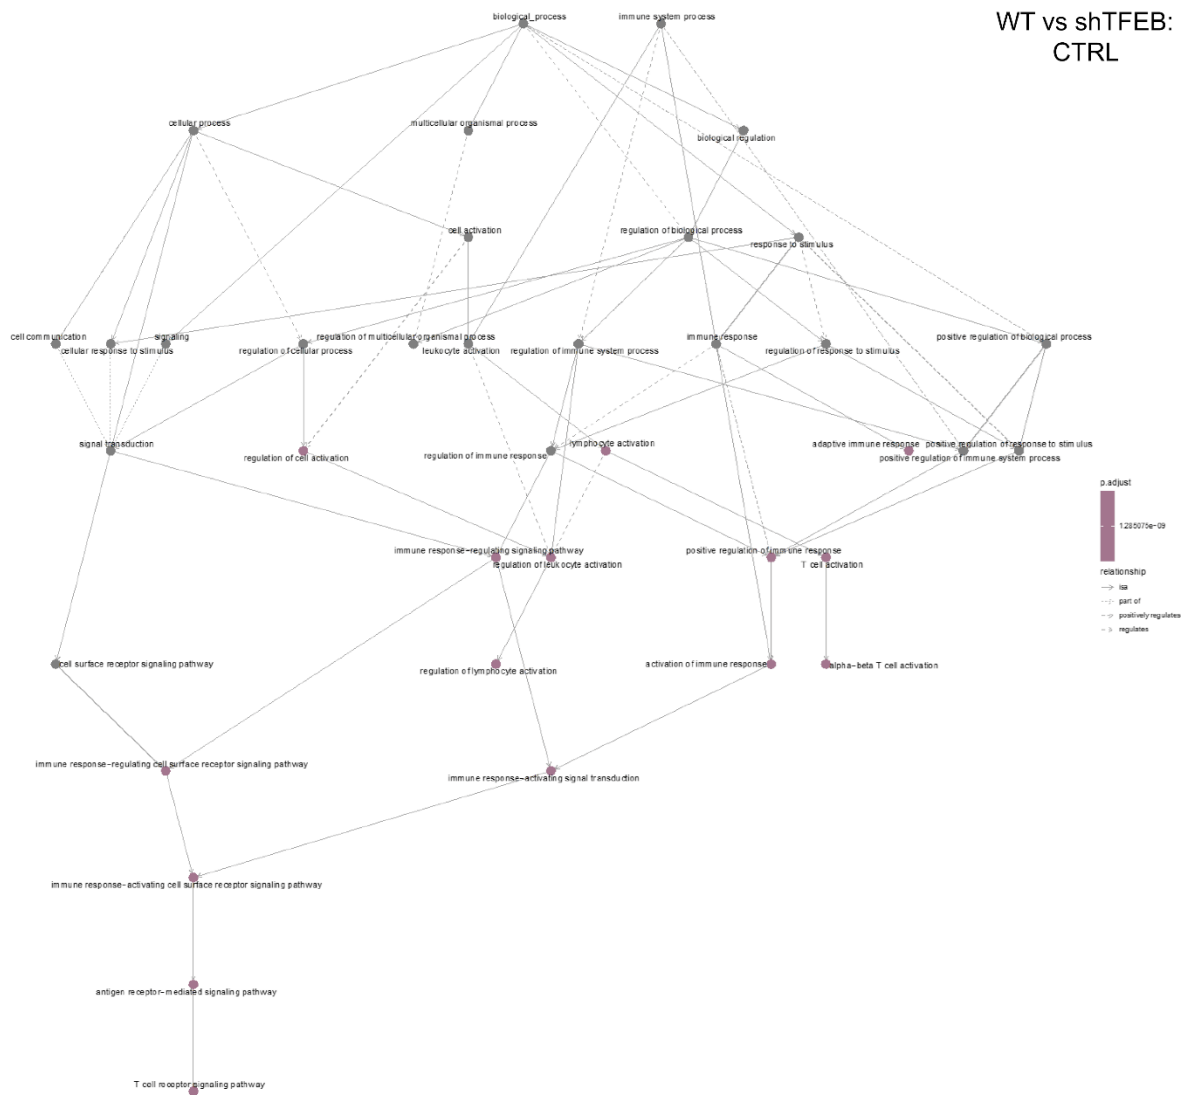

**Supplemental Figure S9. Gene network of biological processes differentially up-regulated in wild-type versus TFEF-silenced non-small cell lung cancer tumors. GSEA performed on clustered cancer cells from wild-type (WT) of TFEF-silenced (shTFEB) tumors in animals treated with vehicle (CTRL; n=2 tumors/group). Purple nodes: significantly regulated processes.**



Supplemental Figure S10

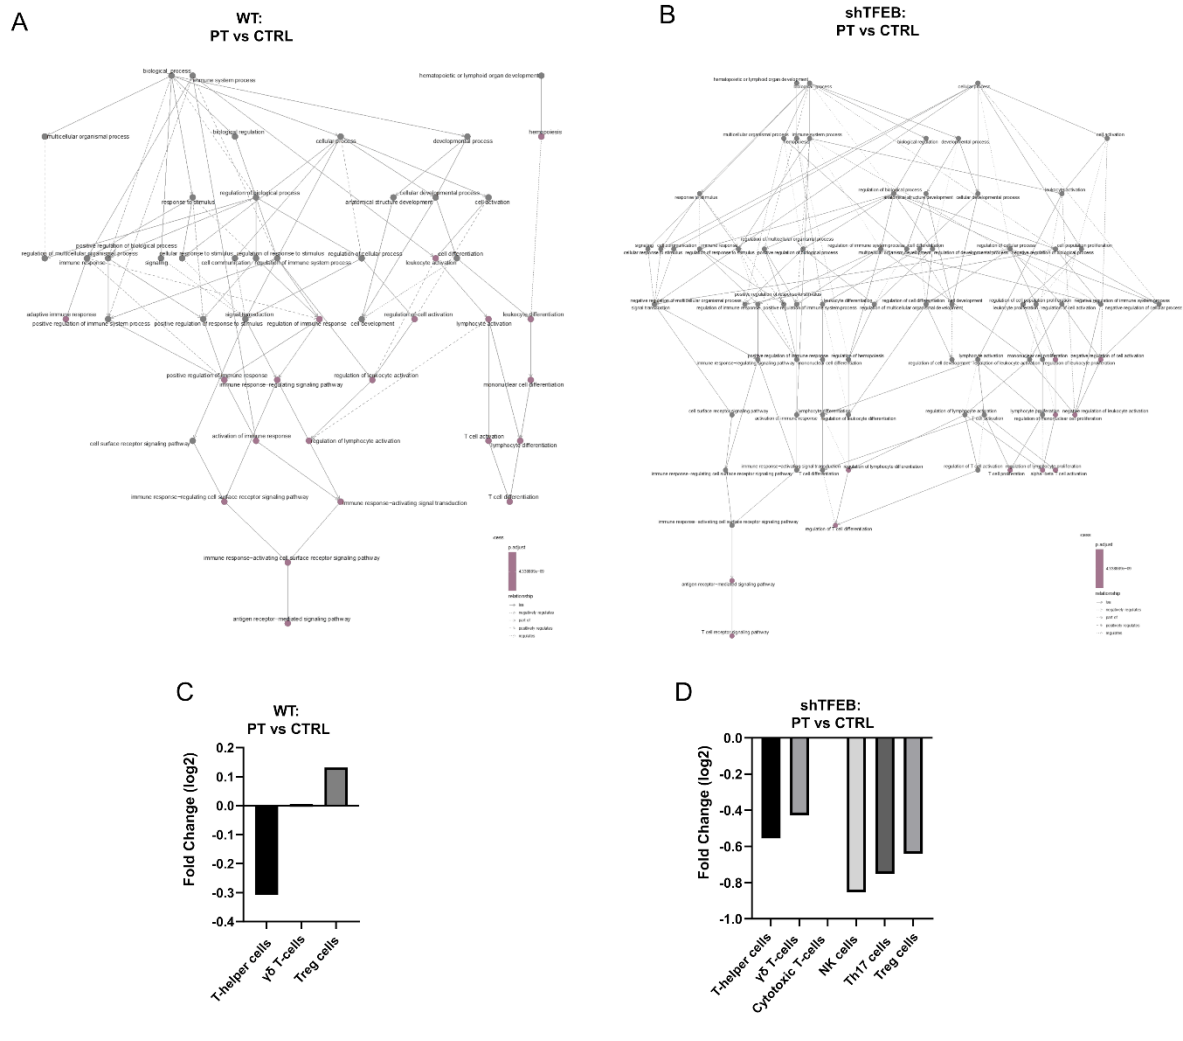

**Supplemental Figure S10. Differences in immune-related processes and immune-infiltrating populations in cisplatin-treated non-small cell lung cancers. (A-B).** Gene network of biological processes differentially up-regulated in wild-type (WT) versus TFEB silenced (shTFEB) non-small cell lung cancer tumors, based on GSEA performed on clustered cancer cells from animals treated with cisplatin (PT). Purple nodes: significantly regulated processes. (C-D). Quantitative changes, expressed as fold change in a logarithmic scale, of the differentially present immune-infiltrating populations emerged by the comparisons of the following groups: WT PT versus WT CTRL (C), shTFEB PT versus shTFEB CTRL (D; n=2 tumors/group).

Supplemental Figure S11

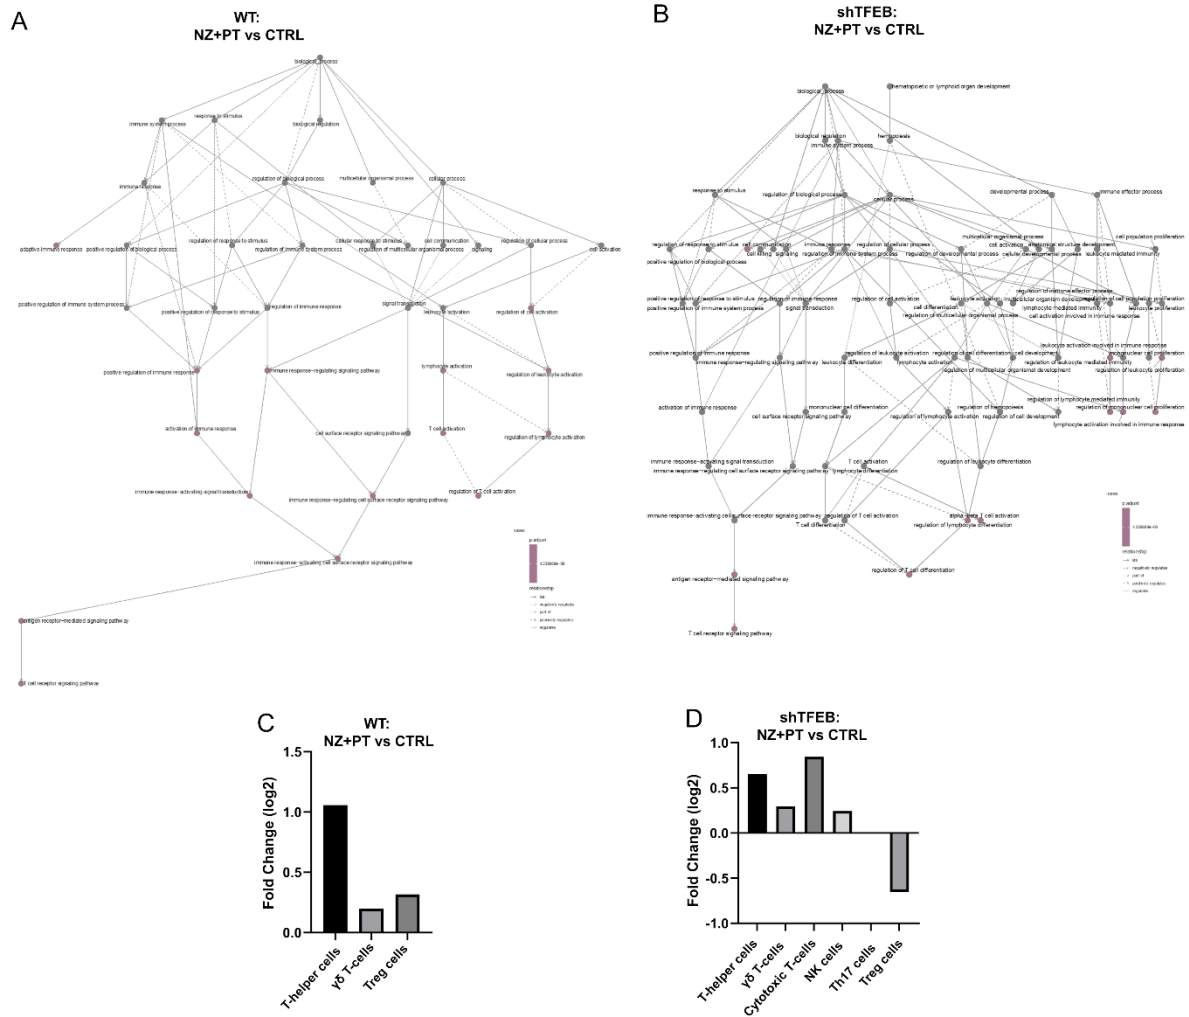

**Supplemental Figure S11. Differences in immune-related processes and immune-infiltrating populations in non-small cell lung cancer treated with cisplatin and zoledronic acid.** (A-B). Gene network of biological processes differentially regulated in wild-type (WT) versus TFEB silenced (shTFEB) non-small cell lung cancer tumors, based on GSEA performed on clustered cancer cells from animals treated with NZ+PT. Purple nodes: significantly regulated processes. (C-D). Quantitative changes, expressed as fold change in a logarithmic scale, of the differentially present immune-infiltrating populations emerged by the comparisons of the following groups: WT NZ+PT versus WT CTRL (C), shTFEB NZ+PT versus shTFEB CTRL (D; n=2 tumors/group).

Supplemental Figure S12

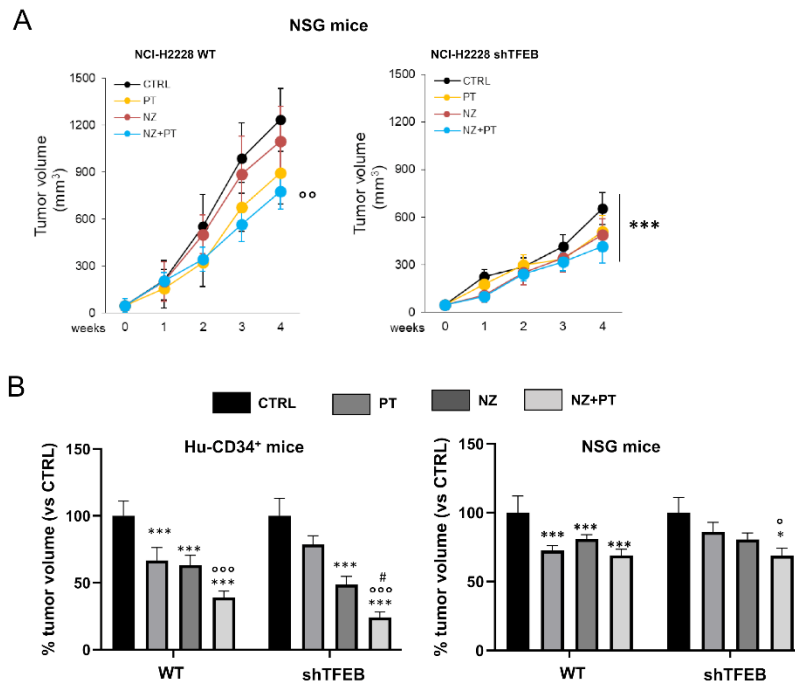

**Supplemental Figure S12. Tumor growth in immunocompetent versus immunodeficient**

**mice.** (A)  $1 \times 10^6$  NCI- H2228 wild-type (WT) and TFEB-silenced (shTFEB) cells were injected subcutaneously in female NOD SCID- $\gamma$  (NSG) mice. When tumors reached the volume of 50 mm<sup>3</sup>, animals (n=5/group) were randomized and treated for 3 weeks as it follows: 1) control (CTRL) group, treated with 0.1 ml saline solution intravenously (i.v.), once a week; 2) cisplatin (PT) group, treated with 2 mg/kg cisplatin i.v., once a week; 3) NZ, treated with 1 mg/kg NZ i.v., once a week; 4) NZ+PT group, receiving both drugs i.v., once a week simultaneously. Animals were euthanized on day 28 after randomization with zolazepam (0.2 mL/kg) and xylazine (16mg/kg). Data are means $\pm$ SD. \*\*\*p<0.0001: shTFEB versus WT tumors;  $^{\circ}$ p<0.01: NZ+PT versus CTRL group. (B) Reduction of volume for tumors implanted in Hu-CD34<sup>+</sup> mice (Figure 6A) and NSG mice (panel A). The mean volume in the CTRL group was considered as 100%. The volumes in the other treatment groups were expressed as percentage versus CTRL group. Data are means $\pm$ SD. \*p<0.05, \*\*\*p<0.001: treatment groups versus CTRL;  $^{\circ}$ p<0.05,  $^{\circ\circ}$ p<0.0001: NZ+PT versus PT; #p<0.05: shTFEB versus WT tumors.
